# Supplementary material for: Isolation and characterization of a novel bacteriophage WO from Allonemobius socius crickets in Missouri
Source: PLoS One. 2021 Jul 1;16(7):e0250051. doi: 10.1371/journal.pone.0250051 (PMC8248633; doi:10.1371/journal.pone.0250051)
Supplement: S2 File — Genome annotation showing start and stop of 63 open reading frames. (XLS) [file pone.0250051.s002.xls]

## Sheet: Sheet1
feature number	contig_id	location	start	stop	length (bp)	strand	function (Rastk-assigned)	function (manual-assigned)	function (Rastk OR manual)	nucleotide_sequence	aa_sequence
1	scaffold1	scaffold1_1_1494	1	1494	1493	+	Phage head, terminase DNA packaging protein A		Phage head, terminase DNA packaging protein A	ccagggaaatggagaacggaaagaactccttatttaaaagaaatcatggattcactttctccgtcctcaccagcagaaaaagtagtattcatgaaaggagcgcagattgggggaacagaagctggtaacaattggattggctatattatcgatcaaacaccaggtccaatgctagtagtacagccaacagttgaaatgggaaaacgttggtcaaaaggaagatttgcgccattaatagagagtacaccatgtttaaaaaataaagtaaaagatccaaggtcaagagactcaggcaatactgtacaaagtaaggaatttccaggtggaatagtagtaataaccggagcaaatagcagtgtaggacttcgttctatgccagtaaaatatctctttcttgat…	PGKWRTERTPYLKEIMDSLSPSSPAEKVVFMKGAQIGGTEAGNNWIGYIIDQTPGPMLVVQPTVEMGKRWSKGRFAPLIESTPCLKNKVKDPRSRDSGNTVQSKEFPGGIVVITGANSSVGLRSMPVKYLFLDEIDAYPGDSGGEGDPVLLSIARTNTFARRKIFLVSTPTIHGISRIEKEFEATDKRYFFVPCPHCNYYQVLKWSQIKWENNDSRTAHYVCTECSGKIENHQKTEMLERGEWRPTNRVKGEKKGFHLSSLYSPVGWYSWTQAVEDFLHAKESEQLLKVWINTTLGETWVDKGEVPDWKQLFNRREFFPIGTVPKGEVVLTAGVDVQKDRLEVEVVAWGKSRESWSIDYRVFEGDTGGGEVWGKLSELLNHHFIGENGLEYMISMMAVD…
2	scaffold1	scaffold1_1720_1944	1720	1944	224	+	hypothetical protein		hypothetical protein	atgtacgatcaagaatatttagcaaaagttgagcaagcaatacaaaagttacaaagtggagaaagagtagtatcaattgcatatggtgaccatgtggtgagatatgcagaagtagatataaatgatttactcagcctcagacaacgcatcaaaagtgaactaaagattgctgaaatgaagcctaaacgaaagattatttttgcaacaaataaaggagttatatga	MYDQEYLAKVEQAIQKLQSGERVVSIAYGDHVVRYAEVDINDLLSLRQRIKSELKIAEMKPKRKIIFATNKGVI
3	scaffold1	scaffold1_1941_2645	1941	2645	704	+	N-acetylmuramoyl-L-alanine amidase, putative( EC:3.2.1.17 )		N-acetylmuramoyl-L-alanine amidase, putative( EC:3.2.1.17 )	atgagggagaattttctgagaaaagttgtaaaagaggaatattctgaatttttagagcaaataaaaactttcataaaactatgggagaatagagagagtccagtaagtggaataatagatttgtcacattggcaagaaaatgtggattttgagttagctaaagagaatggtatagttggagtaattcacaaggcaacgcaaggaacagagtacatagattcaaaatacaaagaaagaagaaaagaagccaaagacttgagtctattatggggttcatatcatttcggtgtaggagaagatggaagagatcaggcaaatcactttttgaatacagtgggtgaaactaaaaatacaattgttgtgcttgatattgaagagaacgaaagtggaaaaaatata…	MRENFLRKVVKEEYSEFLEQIKTFIKLWENRESPVSGIIDLSHWQENVDFELAKENGIVGVIHKATQGTEYIDSKYKERRKEAKDLSLLWGSYHFGVGEDGRDQANHFLNTVGETKNTIVVLDIEENESGKNIEPKQAEDFVKKIQEETGRLPLVYGGANFLKDFATPILTKCPLWIARYGDQPVLPQGWNKWILWQYTDGKNGPEPHEVSGIGKCDRNKFNGTLKELREFWLV
4	scaffold1	scaffold1_2642_3793	2642	3793	1151	+	Phage head, portal protein B		Phage head, portal protein B	atgatgctgaaaaatttcaaacaactatttagtaagccaaaaataaaaaattctgcatgggatgcatcaggctcaggaagaagagtaatgtattggcaaggagaaacaggaagcataaataatttgctttctcaaagccttgagcacttgcgtagccgctctcgtgatatggtaagaaaaaatccttacgctgcaaatataattgatacgatagtaagtaactctattggaacaggaataaaaccacaatcaaaagcaagagatggagaatttcgaaagaaggtgcaagaattatggctaaaatggacagatgaagcagacagtagtggagtaagtgatttttatggattacaagctctagtatgcagaagtatgatagagggaggagaatgttttgta…	MMLKNFKQLFSKPKIKNSAWDASGSGRRVMYWQGETGSINNLLSQSLEHLRSRSRDMVRKNPYAANIIDTIVSNSIGTGIKPQSKARDGEFRKKVQELWLKWTDEADSSGVSDFYGLQALVCRSMIEGGECFVRLRTRKLEDRFSVPLQLQVLESEHLDNKSNQTLANGNIIRNGIEFNRLGQREAYYLFKEHPGESMFGESVRVPANDVLHIYKPLRPGQIRGEPWLSSILLKLYELDQYDDAELVRKKTAAMFAGFITRLDPEANILGESESNEQGVALSGLEPGTMQLLDPGEDIKFSEPSDVGGSYEAFMRQQLRAIAIGTGITYEQLTGDLTGVNYSSIRAGLIEFRRRCTMLQHNIMVFQFCRPVWDRWLAYYYPQM
5	scaffold1	scaffold1_3875_4069	3875	4069	194	+	Phage head, portal protein B		Phage head, portal protein B	gtggatccgctaaaagatcagcaagcacagcaaatggcagtaagaaatggattcaagagtcgagcggaagtagtatcagaaatgggttatgatgtagaagaaattgaccaagaaatagcagaagatcaaagacgtgcaagtgaactgggcttaagttttgattctgacgttacggccaatcaagaggtgatatga	MDPLKDQQAQQMAVRNGFKSRAEVVSEMGYDVEEIDQEIAEDQRRASELGLSFDSDVTANQEVI
6	scaffold1	scaffold1_4066_4413	4066	4413	347	+	Phage head, head-tail preconnector protease C / Phage head, scaffolding domain Nu3		Phage head, head-tail preconnector protease C / Phage head, scaffolding domain Nu3	atgaaacaacaatggctaaacagatgtgtaatggtagaaccaaggagttttgagttactgtcactacaaacaggaaagcagcctatctttaaaaatataaaacatgcagtaagaaatagtgaaagaggaataataccgatacatggcattttaactaaaaaacctggtgcatttgatgaaatgctcggaatgacatcatatgagcaaatagaagaacaaattacacaagcattagcagatagtagcatagagacaattatacttgatatagatagcccaggaggagaggtaaacggtgtatttgatttagctgattttatttatgaatcaagaggaaaaagagaataa	MKQQWLNRCVMVEPRSFELLSLQTGKQPIFKNIKHAVRNSERGIIPIHGILTKKPGAFDEMLGMTSYEQIEEQITQALADSSIETIILDIDSPGGEVNGVFDLADFIYESRGKRE
7	scaffold1	scaffold1_4659_4973	4659	4973	314	+	Phage head, head-tail preconnector protease C / Phage head, scaffolding domain Nu3		Phage head, head-tail preconnector protease C / Phage head, scaffolding domain Nu3	gtgaatcgtttatatgaaatgctggttgagctaatagcacggaatagaaacctctctgtagaggcaataaaaaatactgaagcagggctatattttggtgaaaatgcagtagagataggccttgcagacggaattacaattctttcatatattaataaaaacaggagtattactatgaatgaacaaactacaactgacctagaaactgataatttaactaagtatcgtactgaagttcttgaattaatacgtttatgtaacttatcacgaatgccagagaaaataggagaatttattgagcagagcgtaagtgtt	MNRLYEMLVELIARNRNLSVEAIKNTEAGLYFGENAVEIGLADGITILSYINKNRSITMNEQTTTDLETDNLTKYRTEVLELIRLCNLSRMPEKIGEFIEQSVSV
8	scaffold2	scaffold2_1_456	1	456	455	+	Phage minor tail protein Z		Phage minor tail protein Z	aaaagaagaaaagtagaattagcaacggtaaaggcattaaacaaaacggcactgtggttaaaagcgcaagcagctaaggaaatcagtgaggaaaagaagataaaattaacggtaatgagaagaaggctaagaatttttaaggcgaaaactagcagattagaagtgttaattagagcaaatctctatgacattagagcatcgacaattggcaaaatacaaaaaacaagaagaggatcgaaagtaggaaagcatgagtttataggaggatttgcagcagttatgccaaaaggaaatagcggtatttttaagcgtgaaggaagagcagcattgccaataaaggaagttaaattgccattggaaccagaagcatcaaaagtaataagagatcttgttaattat…	KRRKVELATVKALNKTALWLKAQAAKEISEEKKIKLTVMRRRLRIFKAKTSRLEVLIRANLYDIRASTIGKIQKTRRGSKVGKHEFIGGFAAVMPKGNSGIFKREGRAALPIKEVKLPLEPEASKVIRDLVNYEVEKVFKKFFERDITENV
9	scaffold2	scaffold2_453_926	453	926	473	+	Phage protein	hypothetical protein	hypothetical protein	atgaattttaaagatttacatcaagcaatttgcactaagttaaaagaagaaatatcagcaatacagacatgcgaaatttatccatcaataagaaaagaattattagcgccagcagtatttgtggaacttagtggctttgaaaaaggatatgatccaggaacagaagaattggccatgaaagcaagatttgaggcgcgaattgtagttgatggaacagtcgagaattcctcgttagttgtaaggtcattagcagcagaagtagcaagagtagtaaataaaaatacttggaacgtgaaaaatgtttcgccaggagaatttatctctgcagaagttgacggatttagacccgaattagatgcatatttggtgtggatggttgattggagtcatcagcttcat…	MNFKDLHQAICTKLKEEISAIQTCEIYPSIRKELLAPAVFVELSGFEKGYDPGTEELAMKARFEARIVVDGTVENSSLVVRSLAAEVARVVNKNTWNVKNVSPGEFISAEVDGFRPELDAYLVWMVDWSHQLHLGKSVWEEGKIKPHKIKVGENVGK
10	scaffold2	scaffold2_913_1377	913	1377	464	+	Phage baseplate assembly protein V		Phage baseplate assembly protein V	atgttggaaaataattttgccatttcagagctaaatagaaaattagcaaacattatccgtattggtctagtaaaagaaatagattatgaaaaagcaaaagtaagagtgaaaataggagaatttataacagattatttgccatggataacaagcaaagcaggaaaagatagagattggtctccgccagatatcgatgaacaggttatggtattttctcctcttggtgaattatcattaggagtggtattaggaggaatatatcaggaaaaataccctgcactagagaataaaaaagaaataaatagtataaagtttcaagatgggacaaagtttacatatgataaagagaagcatcatttagagattgaagtagtagacaaaataacactgaaggctggg…	MLENNFAISELNRKLANIIRIGLVKEIDYEKAKVRVKIGEFITDYLPWITSKAGKDRDWSPPDIDEQVMVFSPLGELSLGVVLGGIYQEKYPALENKKEINSIKFQDGTKFTYDKEKHHLEIEVVDKITLKAGESSIEITKREIKLKADRINLN
11	scaffold2	scaffold2_1378_1632	1378	1632	254	+	FIG01207644: hypothetical protein	PAAR-domain containing protein	PAAR-domain containing protein	atgaataaatcggttgtacgagtaggagactactgtggagaagctataccacatttctgcattagcggcagtaataatgtttttgtaaatggtaagccaacgtgcagacaaggagacagttttagtgaaggaaaagtaatgattcaaggatcaaaaacagtgtttgcaaatggctatggagtgggaagagttggtgacattgtttcttgttctaatacaatgaagagaggtagtaataatgttttctcagaatga	MNKSVVRVGDYCGEAIPHFCISGSNNVFVNGKPTCRQGDSFSEGKVMIQGSKTVFANGYGVGRVGDIVSCSNTMKRGSNNVFSE
12	scaffold2	scaffold2_1629_2417	1629	2417	788	+	hypothetical protein	hypothetical protein	hypothetical protein	atgactaaaattgatagaaattgggataaagttatagaaaataattttttagataaaatttctgatttacctacactacatcctaaaatgggtattttacgttatcctgcaaatgtaggctgtgttttcggattggtagaatctgatacatttaatgtgatatttggaggcaattttgatgattctagaataactgtaatagctaaaaaaataatatctctttataggaagaagaatttaccatatgcatggtgggttggtccaaattcaaggtcagaaagatctcacgaaatactaaataaactaggtttatcacacacagaaactgagataggaatgatgataagagttgacgaaattagtgcagtgagctcgtacaatcttgatatagtaatggta…	MTKIDRNWDKVIENNFLDKISDLPTLHPKMGILRYPANVGCVFGLVESDTFNVIFGGNFDDSRITVIAKKIISLYRKKNLPYAWWVGPNSRSERSHEILNKLGLSHTETEIGMMIRVDEISAVSSYNLDIVMVETEQELVDFSRVFASTGDKEALIYYKMVEPYIKDSKIKLFVKYCNYVPVATASVILNKGNTAGIYDIITHPEFRCRGFGTSITKFALNYIKEQGYKYACLQASEEGLSMYLKLGFVPHGEFLVYSNKRT
13	scaffold2	scaffold2_2417_2752	2417	2752	335	+	Phage baseplate assembly protein GpW		Phage baseplate assembly protein GpW	atgaagggaatgagcaaagaaacaggaaaagcgcttgaaggaatagaccatctgaaacaatcaataattgatatattaaccactcctattaacagtaggataatgagaagggattatgggtcgaggttatttgagttagttgataaaccgataaatagagatttaacacttgagatatatgcagcaacagcagaagcactggggaaatttgagaggagatttaagttagaaaaagtaaaaatgacagaggtgaaagaaggaaaagtaacgcttgacctagaaggattatatgtaccaagtgggaaaaacattcgctttgatggaatggttatataa	MKGMSKETGKALEGIDHLKQSIIDILTTPINSRIMRRDYGSRLFELVDKPINRDLTLEIYAATAEALGKFERRFKLEKVKMTEVKEGKVTLDLEGLYVPSGKNIRFDGMVI
14	scaffold2	scaffold2_2755_3540	2755	3540	785	+	Phage baseplate assembly protein J		Phage baseplate assembly protein J	atgcagcagccaaatattatcgaaccactgaactttgaagagattttttctcggatgaaggaagagttagtgaagagagatgaaagttttacagcattagtagaaagtgacccagcgatgaaggttttggaagttgcagcatggagggaattactactcagagaaagaataaatgaagcaataaaaagtaatttacttaagtttgcaatgggagaagatcttgataatttggctgagttttatggagtggagaggcagaaagaagaagaggacgaacgatttagaaaaagaattaaagcaaaaataaaggggtggtcaacaggaggaagcaaggaacattataggtattatgcactgtcagcagatagtagagtaaaagatgcgttagttgagtcacca…	MQQPNIIEPLNFEEIFSRMKEELVKRDESFTALVESDPAMKVLEVAAWRELLLRERINEAIKSNLLKFAMGEDLDNLAEFYGVERQKEEEDERFRKRIKAKIKGWSTGGSKEHYRYYALSADSRVKDALVESPVPGSVQISILSTELSTVSEELLEIVKKQVTRDDIRVLTDTVTVIGCNITEIDIHSRMSISPVISKEEIKEQFIKKFEASRRLGWNVTRSWIIANLFVDGVENVELIEPKEDVVVLGNECANLRNLKIE
15	scaffold2	scaffold2_3540_4700	3540	4700	1160	+	Phage tail formation protein I		Phage tail formation protein I	atgttattaccaccaaacgcaacaaagcaagaaaaagcgctggttaatgcaatagattataaagtagatcctggttgtataagggggtttaaatttaacctaaaagaagaagtattgccgtggttggttgaagagtacgggctgggagaaatcctacattgggtaaaagataagaaaaggactataaaagaaggggtaaaatttcagcgtttaagaggaaccccagagtcacttaaaatagcactaaaatgggcgaatatagaagacattacaattatcgaagaaccacctggtaaacatttttttgaactgcagatagggataagggatgttccaaatgacttttttgtagatgcagtagtagaacttgcaaaactatcactaccagcaagatcaagg…	MLLPPNATKQEKALVNAIDYKVDPGCIRGFKFNLKEEVLPWLVEEYGLGEILHWVKDKKRTIKEGVKFQRLRGTPESLKIALKWANIEDITIIEEPPGKHFFELQIGIRDVPNDFFVDAVVELAKLSLPARSRLMRIFNDHYNISRFILDESFFGSLLSDYSGKKVEKDGPVLSFGRVNFFRFSGTSIKVIESYLRDHYEQAFSNDIYRLDVAVLGETEPHTKNYKGIYERNHQWYNLKALYPLPQSLLPEIKFAKAQIVLSDSWNLGEINACFPVSSVEERGNKFVLGSDKLSGQRWSLKHKPILERFSVTHHYKVEDFTNQKVIRFGIAEHNIHFESELDLEQKDSIHELENYILVFYPGVLKWHEHRHLHRSWKSGQVISIIS
16	scaffold2	scaffold2_4869_5579	4869	5579	710	+	FOG: Ankyrin repeat		FOG: Ankyrin repeat	atgagttttagcaaggaatcttttagtaagttttttaaagaagtatcaagtaacgatattaataaaagaaatgaagaaggagagacgatcttgcaccaagcagtagaaatctccgattacaaaacagtgaggttattaataaaaaaaggggcagaggtaaatgcaagagataaaaatggttatacacctctgcactgtgcagtattcgcgaaaagtttagaaaatgtaaaagtgctgctaagggaaggagcagaagtaaatgccactcaatatgtcactggatgtacgccactgcactctgcgtgtaaaatgggaggagcaggagttgaaataataaaagagctggtaaaggcaggggctgaggttaatcaactgaataaatatggcgcaacaccaatg…	MSFSKESFSKFFKEVSSNDINKRNEEGETILHQAVEISDYKTVRLLIKKGAEVNARDKNGYTPLHCAVFAKSLENVKVLLREGAEVNATQYVTGCTPLHSACKMGGAGVEIIKELVKAGAEVNQLNKYGATPMYYIWESEKYCSWNSEENEKASKFLREQGGITKSRELTCYGIERLVGEIADMLNGSYMPELKIIEIGEIRKRDKSLIKKECQNLASKIMSQVNEMIDEVVRKKA
17	scaffold2	scaffold2_5606_6079	5606	6079	473	+	hypothetical protein	Ankyrin repeat-containing protein Pk2	Ankyrin repeat-containing protein Pk2	atgttaaagcttggcaaatttaataagtcagcaaaagaattattagagaactcatataaaaatatttatgcaagagacgaaaagggaagaacagttttgcattatgcagtagatgcaaaaacagtggagttattagttgaaaaaggagcgaatgtgaatgcagcagatgtagaaggatatacagcactgcacctagcggtaacggagaaacgtctagaaacagttagagaattgataaaatcaggagggaatgtaaatgctgaagagtatggcaataaatgtactccattgcaccttgcatgtatggtggggaaagtggaagtagtaaaagagttagtggaagcaggagcagaaatagagcaagaagataagttcggaatgacagcaatggattatgcg…	MLKLGKFNKSAKELLENSYKNIYARDEKGRTVLHYAVDAKTVELLVEKGANVNAADVEGYTALHLAVTEKRLETVRELIKSGGNVNAEEYGNKCTPLHLACMVGKVEVVKELVEAGAEIEQEDKFGMTAMDYAKNSKEIIEVLKKETDRIEKLFIRG
18	scaffold2	scaffold2_6084_6518	6084	6518	434	+	Phage protein	hypothetical protein	hypothetical protein	atggaggaagaaacagaaaagaaagtaatgaatttagagaaaaaagcgttagtggagttgagaaaaatgtggaagaaggtatttggggaagaggcacctaaacattcaaagaaatatctgataccgaaactagcatacagaatacaggaggaagcgtatggagaaatgtcaagaaaaggagcaaaaagactagagtatttggcagatcggctagagaagggaaaaagaataagtagtgataaactgccagtagcaggaacagagctaatattagagagaggtgaagagactcacgcggtaatggtaacagataaaggtttaatctacaaagaagaattttttacgtcattgtcagcagtagccggaaaaataatgggaatgagttacaatggcccactt…	MEEETEKKVMNLEKKALVELRKMWKKVFGEEAPKHSKKYLIPKLAYRIQEEAYGEMSRKGAKRLEYLADRLEKGKRISSDKLPVAGTELILERGEETHAVMVTDKGLIYKEEFFTSLSAVAGKIMGMSYNGPLLFGMREREKEC
19	scaffold2	scaffold2_6512_7999	6512	7999	1487	+	Resolvase, N-terminal domain		Resolvase, N-terminal domain	atgctaaaagaggtaagatgcggaatatatacgagaaaatcaaatgaggatgggctagagcagaagtttaacagtttagatgcgcagcgagtagcatgtgagaaatatataaagagcaaagaaggctgggtagcattggcaaaaaggtacgatgatggtggatattcagggaaaaatttagaaagaccagcgataaaggaattatttgaagatgtaaaaggaggagaggtagattgtgtagtagtatatacgctagataggctatcaagagaaacaaaagatagcatagaagtaacatcattttttagaaggcatcgagtaaattttatagcagtaacgcagatatttgataataatacgccaatggggaagtttgtacaaacagtattgtcaggagca…	MLKEVRCGIYTRKSNEDGLEQKFNSLDAQRVACEKYIKSKEGWVALAKRYDDGGYSGKNLERPAIKELFEDVKGGEVDCVVVYTLDRLSRETKDSIEVTSFFRRHRVNFIAVTQIFDNNTPMGKFVQTVLSGAAQLEREMIVERVKNKIATSKEQGLWMGGTLPLGYDVKDKELIINEKEAKTVKHIFERYVELKSMAELARELNSQGYRTKADIFKKATVRRIITNPIYMGKIRHYEKEYEGKHEAIIGEEKWKKAQELIKNQPYRKAKYEEALLRGIIKCKSCDVNMTLTYSKKENKRYRYYICNNHLRGKGCESINRTIVAGEVEKEVMKRAEYLYEKWGEKAEEWKNLSFGKQKEVVKKLIKGVMIREDGIELSSEDKVEFIPIKKKGNKCIVVE…
20	scaffold2	scaffold2_8064_8744	8064	8744	680	+	hypothetical protein	hypothetical protein	hypothetical protein	atgccgagtttttttgataaaccgtttacagaacaagtagaagaaatcattaagacgggagatctaaaactactgcaggcactaattggtacaagggcaccaattgggttatcattatattgttctagcttttttcttactagaacagttattgcacaagcaaagtatcaagcatatagtgctctgcttaacgtgctaactgaatatcaaaaagcagaaaaagagatttttgtagacaacataaaaagggatatagaaagacaaataagcggtaatgaggatagattacgccaaaaagcacttttaccatcgtcaagtaataatttaaaatctctaactaataatagttgctctgatttagaaagttatgttcaagaaacagatgtatcaagtttgtgt…	MPSFFDKPFTEQVEEIIKTGDLKLLQALIGTRAPIGLSLYCSSFFLTRTVIAQAKYQAYSALLNVLTEYQKAEKEIFVDNIKRDIERQISGNEDRLRQKALLPSSSNNLKSLTNNSCSDLESYVQETDVSSLCTFNLQKVIEIYHNYISREEVKNLEKVLLKAKEMEDRYSYIESQKTNLQYNSKREKARNTVKDNEPLLLKIKDKTFFDSWYTKSYCTKFFVKQK
21	scaffold2	scaffold2_8741_9328	8741	9328	587	+	hypothetical protein	hypothetical protein	hypothetical protein	atgaataagaaacatatactacatgaagaaatagtaaagagcagttctccctatatgaaagataaaattaatagtgcaaaaagcaagctaggtacttcctttaataaagaagcagttggaagagtaataaataaattagtgaatgattaccttaagattttaccaactagttttggagtaaaagaatcgttattgtcctacatgaaatgtgttgatattgatgattatataggaagaatgaattatgaggcagtaaatcataggattattagtagagccaatgaggtgatcttaagtgagtcaattgtacaaaataatttgaatgatgatgtagaaagaggtttacagtacatagtggacagaatggatgtatctcttcttactgcagtagagcaagaa…	MNKKHILHEEIVKSSSPYMKDKINSAKSKLGTSFNKEAVGRVINKLVNDYLKILPTSFGVKESLLSYMKCVDIDDYIGRMNYEAVNHRIISRANEVILSESIVQNNLNDDVERGLQYIVDRMDVSLLTAVEQEMLNEIAERAANHRERHSKRKDLELLSICNGGEFEDKLSLPTDLSFSEIERLYKDMLSIEFKEQ
22	scaffold3	scaffold3_1964_3	1964	3	1961	-	Glycosyl transferase, group 1 family protein		Glycosyl transferase, group 1 family protein	atgaaaatattaaaagttattcatggttaccctccttattatagtgctggttcagaggtttatagccaaactcttgctcatgaattagcaaataacaatgaggtacaagtatttactaggtatgaaaatagctttttacctgatttttattacactacagtcctagatagtagtgactctcgaatcttactgcatttaattaatatacccacagctaaatatcgttacaaatttatcaatgaagaagtagatatacaatttaaaagagtaatagataactttcagccagatcttatacattttggtcatcttaatcatctatcaattactttaccaaaaattgcttttaaagaaaacatacctacaatttttacgctacatgacttttggttaatgtgt…	MKILKVIHGYPPYYSAGSEVYSQTLAHELANNNEVQVFTRYENSFLPDFYYTTVLDSSDSRILLHLINIPTAKYRYKFINEEVDIQFKRVIDNFQPDLIHFGHLNHLSITLPKIAFKENIPTIFTLHDFWLMCPRGRFIQRNSEDLLRLCDGQKDQKCATQCYKGYFTGDEEFLNLDINYWEQWVATRMKHTRKIIDYIDYFISPSKFLMDKFTQDFYVPINKISYLDYGFDLNRLKNRNRAQEKEFIFGYIGTHTPEKGVDLLLKAFSHLSSQAKLRIWGAAREETKALKAIADQFSPVVKERIEWMGSYDNKNIVTDVFNKVDAIVVPSIWGENSPLVIHEAQQLRIPVITADYGGMAEYVRDGLLFKHRDASSLSEKMQILSTNQELYNKLTQKGY…
23	scaffold3	scaffold3_2874_1921	2874	1921	953	-	NAD-dependent epimerase/dehydratase family protein		NAD-dependent epimerase/dehydratase family protein	atggggatattaataacaggtgctgcaggtttgatagggtcaaccttggtgaaaaagttagaaaaccagggccatgaagtaataagctgcgatattaggtttcgcgataatccactcagttttttttcagaagatgtagtaccactacttgctaagtgtacaggaattattcacctggctgcaatttctcgagttatacatggtgaactttatcctgaactgtgtaaaaaaattaatgttgatggtacaatgcagtttttagggttatgtaagtcactttcaaataaaccgtggtttatatatgcaagtagtagggaagtctatggagagcagaagaaactgccggttacagaatctgctagtatcgatccaataaataattatgccaaaggtaaagca…	MGILITGAAGLIGSTLVKKLENQGHEVISCDIRFRDNPLSFFSEDVVPLLAKCTGIIHLAAISRVIHGELYPELCKKINVDGTMQFLGLCKSLSNKPWFIYASSREVYGEQKKLPVTESASIDPINNYAKGKAFIEEQITSSKDFNVAILRFSNVYGGLLDHNSRVIPALCINALRGDPIKIEGKECVFDFTYLDDVIEGICLTVKYLQSEKSSLPAIHLTTNSPCTLENLAKTILKVTKSDSRIDFYPPRNFDVTKFHGDFTRAKELLGWSPKHSLEVGLSNFIKSLQNNTQEYPDNIDMVIYENIKSYSWLPSLL
24	scaffold3	scaffold3_3749_3000	3749	3000	749	-	N-acetylglucosamine-1-phosphate uridyltransferase (EC 2.7.7.23) / Glucosamine-1-phosphate N-acetyltransferase (EC 2.3.1.157)		N-acetylglucosamine-1-phosphate uridyltransferase (EC 2.7.7.23) / Glucosamine-1-phosphate N-acetyltransferase (EC 2.3.1.157)	atgagtaaaattttgataatattagcagcaggaaaaagcagtagaatgaattctgaatattcaaaagcgttgcaccaagtgggaaatcttactcttttagaacatataatttctaatgcaaaatcgctgagtctaaaaagcttatcaattgttgttaacaactcccttctaaaagatttagaaaactttgataccctaaaaagtataatcgatcaatacaatataaagctaataatgcaagaagatattacaggcactggcactgcagttaaaattgctctagaaaatctggaagagttatctgatcaagacatagttttaatacagtatggagacactccctttatatctagtgatacagttatgaaaatgactgattgtttaaagtataataattta…	MSKILIILAAGKSSRMNSEYSKALHQVGNLTLLEHIISNAKSLSLKSLSIVVNNSLLKDLENFDTLKSIIDQYNIKLIMQEDITGTGTAVKIALENLEELSDQDIVLIQYGDTPFISSDTVMKMTDCLKYNNLVLLGFNSQDEQYGRLVIDNYGNVQKILKNGDKMLLANSGIIVSYAKDLFTLVKEIKFNNSTNEYCLNDIVPIAANNNLSVGYVVSDEREAMGVNNKEDLIKAEHYFQKKRRPTFLS
25	scaffold3	scaffold3_11966_3870	11966	3870	8096	-	hypothetical protein	Ankyrin and tetratricopeptiderepeat family protein	Ankyrin and tetratricopeptiderepeat family protein	tggccaggtaattattttgctgttcatttcagggaattagatgaaattctttcacgagcttatgaggaattaaagctaaagaacgtattattatcagaagagatagaaatttttgttgaaaataaattgataaacctccgttttttctctagtgcttctggacaagatcagaatgcgaagagttatcttaataacataagagagcggattgagttagtacttcaaaatattagcctgttaaaggcagagtattcaaacacagaaaaagtagatgaaaagtttttattcatagcaaaatttattgcacaaaatattcatatattaaagcggcagttgaaatcaacctacgatagactaccttgggaagaaatggaattttgtttgatcagttttgtttct…	WPGNYFAVHFRELDEILSRAYEELKLKNVLLSEEIEIFVENKLINLRFFSSASGQDQNAKSYLNNIRERIELVLQNISLLKAEYSNTEKVDEKFLFIAKFIAQNIHILKRQLKSTYDRLPWEEMEFCLISFVSSHIKRQEMNLFYNATLNKSKILDHLENFAKKLKEEKDIIEGVDIGKFADLPKLKRERVVAEIVSNYPQFGELYSNYQQIRDIHSLEKISDYIKLALSANPKEREGQLIITRVLQVIGEYLKNTLESPKLSSTTSELLLLSLPKNTREVIIDLRNSLSHAYSLSKRTEIEENTDVNFFIGVQNDTKRIDNVITDILYNNKIKIVIILLKKITRSENLDEIKEVAGIFSNVELDEMITESFKVMEHDKLEKLIKELSNNITEKTNYEK…
26	scaffold4	scaffold4_171_1	171	1	170	-	hypothetical protein	Transposase	Transposase	ttggaaactacagttgagagatggtgctttttctttaagtatgcagaagaaacaactgatgaagatttaagaaaaatagcagaaaaatcaccaataataaagttagcatatgatgagttagataaatttcattggaatgagaaagatcttgtagcttatgaagaaagggta	METTVERWCFFFKYAEETTDEDLRKIAEKSPIIKLAYDELDKFHWNEKDLVAYEERV
27	scaffold4	scaffold4_514_266	514	266	248	-	hypothetical protein	Transposase	Transposase	atgaatcctgagattgcttctgataaacaaagtatcgttgatgtcctctgtaaggattctctcggaaatagatatattgcggaaatgcagctcgctcgtgataaaggctttgaaaaacgtgctcaactttatgctgctaaagcttactcaagacagtctggcaattacattgatttaaaactgttttctttattgctatttccaatagtactcttttccttcagatgtttattatatttctactcataa	MNPEIASDKQSIVDVLCKDSLGNRYIAEMQLARDKGFEKRAQLYAAKAYSRQSGNYIDLKLFSLLLFPIVLFSFRCLLYFYS
28	scaffold4	scaffold4_539_682	539	682	143	+	hypothetical protein	Hypothetical protein	Hypothetical protein	ttgaatagcattgactcagtaaagcctaagatatcatttaaaaaatggataaggatattcttatttttttcagtaccaaaaattttcttaaaagttaagtctaattttggatcgagaaacttcgaaagagccatgagaaagtaa	MNSIDSVKPKISFKKWIRIFLFFSVPKIFLKVKSNFGSRNFERAMRK
29	scaffold4	scaffold4_1081_1617	1081	1617	536	+	Ribonuclease HI (EC 3.1.26.4)		Ribonuclease HI (EC 3.1.26.4)	atgggcgaaaaaaagaaggttacaatatatacagatggagcttgttctggaaaccctggtcccggtgggtgggcagccgtagtcatgtatgaaaataaaagtgtctttatcaagaaacgtatctctggaggtgaagaagacacaacgaataacaaaatggagttaaaggctgtgattaacgggctaaagatgttgaaaatttcttgcgaagttgttttacacactgatagtcagtatattaaacaaggtataacagagtggatcaataaatggaaggtaaatggttggaagacagccgataaaaagccagtgaagaacagagaattatggcaggaactagatgaagttgctttgcagcatgatattaattggaagtgggttagagctcacaacggtaat…	MGEKKKVTIYTDGACSGNPGPGGWAAVVMYENKSVFIKKRISGGEEDTTNNKMELKAVINGLKMLKISCEVVLHTDSQYIKQGITEWINKWKVNGWKTADKKPVKNRELWQELDEVALQHDINWKWVRAHNGNMYNEEADRLARKESKKLKYRDCEVKKSPKNRGSSKFHRLGGEIWQ
30	scaffold4	scaffold4_1608_3407	1608	3407	1799	+	DNA mismatch repair protein MutL		DNA mismatch repair protein MutL	atggcaataattcttttagacacaaaaactataaatcgtatagcagcgggagaagtaatagagaggccagcaagtgtagtaaaggaattagtagaaaatgcaatagatgctggaagttcagagatagaaatcaagatagaaagtggtgggcgtaatcttataactgtaacagacaatggaaatggaatagaaaagaacgatctagaactagcatttatgcgccacgctacttcaaaattaagcgatagtgagttaatagaaatcaaacatcttggctttagaggagaagctttgccttcaattgcagcagtaagcagaatgaaattatcatctaaggcaagtggagcaaaggaagcatggtctataagatatgagggaggagaaaaaataagagagatt…	MAIILLDTKTINRIAAGEVIERPASVVKELVENAIDAGSSEIEIKIESGGRNLITVTDNGNGIEKNDLELAFMRHATSKLSDSELIEIKHLGFRGEALPSIAAVSRMKLSSKASGAKEAWSIRYEGGEKIREITPCSLLQGTYIEVRDLFFATPNRLKFLKTERAETQSIVDIVNNLAMINYSIGFTLTSGNKKLLKYAKQTSFFNRLCETEEEFQSNSLEVKEEEEGIKLTGHICKPTISRGNSTQIYTFVNGRPIKDNLLVGAIRYAYQDFIPVGRYPFAVLHLEIPYDQVDVNVHPNKSEVRFQNKRLIYEIVRRGIIKALSTRFAASDVKSQSIEEFDASKSQEKVDSEEKKNQKEFYEKRPSLLENRLMKEFNAPDERRQSLPETFKYGESPPQ…
31	scaffold4	scaffold4_3476_3985	3476	3985	509	+	Transcriptional regulator		Transcriptional regulator	gtgaaaaaagagaataattaccctaactttttagattacaaagtagtaggacaggaagtaagaaatcgtaggttagcaaagggatatactcaaaaagatttagcaaaaaaaatcggaacaacatatcaggtaatactgcaatatgaaaaaggaacacgcagaatttcaattaagaagttatatgaattagcagaagcattatcaacaactgctagagatctagcttgcggacaagaagtatcaaatgaggaaaggtatgaggaagaagagatattaaatctagtaagaagacataaagagattaaggaccaagaattacgtgaaacgttttatttattaactaaattcatccgtattagtgaggaagaaagtggaaagacagtaaaagtagaggtggca…	MKKENNYPNFLDYKVVGQEVRNRRLAKGYTQKDLAKKIGTTYQVILQYEKGTRRISIKKLYELAEALSTTARDLACGQEVSNEERYEEEEILNLVRRHKEIKDQELRETFYLLTKFIRISEEESGKTVKVEVAKGLVKEGVSAHVISQTTSLSIDEYDNDEKKFLFRIK
32	scaffold4	scaffold4_4009_4413	4009	4413	404	+	Transcriptional regulator		Transcriptional regulator	ttgatacgaggatacactcaagaagatttagcaagcaaagtgggcgtaataaatcaaagaatatatgaatatgaacaaggacgagctgctgtttcacttgaaatgttagatgaaatagcaaagatgctattaattaatattacagatctgcttccagaaacaagagaaaatgagaatagtgaagtggaactatcaaggttaatagaagaatacaaaaagattaaaagccaagaattacgtcatgtactaataaaatctctgtttgaaagcatacaagtttgcaaagagaaagtgaagagagtagaaaagatgaaaattgcaaagaatttagttaaggaaggaatttctatcaatattattttaaaaacagtaggcgtctctttagacgaaattcaacaa…	MIRGYTQEDLASKVGVINQRIYEYEQGRAAVSLEMLDEIAKMLLINITDLLPETRENENSEVELSRLIEEYKKIKSQELRHVLIKSLFESIQVCKEKVKRVEKMKIAKNLVKEGISINIILKTVGVSLDEIQQI
33	scaffold4	scaffold4_4584_5087	4584	5087	503	+	UPF0758 family protein	DNA repair protein RadC	DNA repair protein RadC	atgaataataagaaaagtagtagagaagaaatagagttcagagcattagaaagcaacggtaaagctctacttgatcgtgaagtaatagaaacgtttctaagtgcagtgcataacagggaagaagctcgagttattgctagaaagctaatagataattttggaataggaggagttttaggccaggaaatagatgacttgaaaactatagaagggataactgactctacagtagcagtaattttatgcctaaaggaagctgcaaagagagtaccaagagaagagttaaagaaaggacctgtaatggataacttggaaaccatagtaaaatatttaagggtgagtattggttactcagagaaggaaaagatgaaaataatatattttgatcaaaagtgccgt…	MNNKKSSREEIEFRALESNGKALLDREVIETFLSAVHNREEARVIARKLIDNFGIGGVLGQEIDDLKTIEGITDSTVAVILCLKEAAKRVPREELKKGPVMDNLETIVKYLRVSIGYSEKEKMKIIYFDQKCRLKGEEVLNGKSTGIHKGDYKKSINKKCNISNNVT
34	scaffold4	scaffold4_5077_5241	5077	5241	164	+	UPF0758 family protein	DNA repair protein	DNA repair protein	atgtcacataaccatcctggaggaagcttagaaccttcagaagaagatcaagcagtaacgaagagcttagcagcagcatgtagtactgtaagcgttagattatttgaccacattatcatcacaagtggaggctatttcagctttcgagaaaacggattgttataa	MSHNHPGGSLEPSEEDQAVTKSLAAACSTVSVRLFDHIIITSGGYFSFRENGLL
35	scaffold4	scaffold4_5420_6604	5420	6604	1184	+	hypothetical protein	Site-specific recombinase/resolvase family protein	Site-specific recombinase/resolvase family protein	atggttaataaaataattgtaccttttgatgataaagaaggaggtgtttacgaattaaatgttgatcttgatagattatcaaaaggtgagatgttaaatgcgattataggaattggtcgtactaaggagcaatccacctttgtaagcaaaattaataaggctaaaaaacctggagaagtgcccttccctaatagagacgttcaaatcaactatggaaaagggcttgattatatatatggtacaaaacctttaaatgatcaagcagaagatttaaatccatttgcttcaaatttgcaaaaaataaagccaagtgcaagcgaaagtgaaaagttgagctggtttaagagtgctgtggtagaggcaaaaaacataaatgaattgcacaagattatagatcaa…	MVNKIIVPFDDKEGGVYELNVDLDRLSKGEMLNAIIGIGRTKEQSTFVSKINKAKKPGEVPFPNRDVQINYGKGLDYIYGTKPLNDQAEDLNPFASNLQKIKPSASESEKLSWFKSAVVEAKNINELHKIIDQALASGARLNACNDGEWSFAEYVVLGTHFHRLEKSDRKKIMRKLMLSGAEFHNTLLQNKLIGEIYNELQPEIQPQIDKQLEELEKAGESAVQEGELIDIEIDNTTSYIEFSEDSKVEVAKILEELGSNILKIGNDAVEVKSEKGGIRNYTDMSDGSSIMLEFPTSAGKLNIILYQDVKNYNQVQVKVADKEMWSKLQERGEEIGKNCLFGGVKLKEVVERGSFTRCGIWSEKHAIKEVSNSEVLSSWVNKIREGSKETFREL
36	scaffold4	scaffold4_6699_7607	6699	7607	908	+	Transcriptional regulator		Transcriptional regulator	atggttctttatgtggaaaaaagtctagactatgaagtaggggaaaaagtaaaaagttggaggttagagagagggtatactcagaaggatttagcggagaaaattggtgtaaagtactgggtgatactgcaatatgaaaaagggaatcgtagaatttcaattgaaaggttgtacgctatggcggaagcattatcaatcagtattacggatcttattcctgtatcaaaaagctgtcttgaagatgagggagaagagatattaaatctagtaagaaaatataaaaagattaacgatcaggagttacgtaggatgttttgtttactaaccaaatttgtccaagttagtgagaaaagtagtagaaaatcggaaaaaataaaaattgcaaagggtctggttaaa…	MVLYVEKSLDYEVGEKVKSWRLERGYTQKDLAEKIGVKYWVILQYEKGNRRISIERLYAMAEALSISITDLIPVSKSCLEDEGEEILNLVRKYKKINDQELRRMFCLLTKFVQVSEKSSRKSEKIKIAKGLVKAGISVDVVAKTIGLSADECVEEKTGSIYYKIGKKIKEWRVVREYTQKDLAEKMSTTRHEISNYEQGRTAVPLDKLYGIAKVLSINIMDLLELTGDEIENELPDLVKEYKEIESQELRNALRESLFEGIRICEEKVRKAERIKVAKDLVKGGISIDIILQIIGLSADQIA
37	scaffold4	scaffold4_7633_8547	7633	8547	914	+	Transcriptional regulator		Transcriptional regulator	atgtttgtttctgtaagagatgttagttctataaattataaaatagggcaaaaaatagaagagtgtagattaatgcaaaggtatactcaagcagagttggcaagtaagattagattagcgtatcaagaagtaaacagctatgaacagggatataccgctatttcaattgaagtattatatacaatagcaaaagaactatcggttaatgttatagatctgctacctgaaccagtaatagtaagagaagataaatatgaagacgaggaaatactctatctaacgaaaatatacgagaatcaaaagttaggcaaaatagtaccttcattagtcaggtttgttcatattagcgaaaaaattaatcaagaagaggcaaggttggaaatagcaaaaaatctagtg…	MFVSVRDVSSINYKIGQKIEECRLMQRYTQAELASKIRLAYQEVNSYEQGYTAISIEVLYTIAKELSVNVIDLLPEPVIVREDKYEDEEILYLTKIYENQKLGKIVPSLVRFVHISEKINQEEARLEIAKNLVKEGVSVDIISQATGLSIYEYDNTEREICTDSIYYRIGQRIREWRLIRRYTQKDLADKVGVTLKEIHEYEIGYTAISFDKLYEIAEGLSVNIKVLLPKTNEDNKEENKLLSLIRKDENQESLVKSLSEDMKSSKEKVKKTEKIKVAKNLVKAGVSTDVILRASGLTADECEN
38	scaffold4	scaffold4_9789_8866	9789	8866	923	-	patatin family protein		patatin family protein	ttgattaaatacattttatccgttgacggcggaggcataagaggcataataccagcaataatactagcagaaatagagcaaaggacaagaaagagggtagctgaaatctttgatcttatagcaggtacttcaaccggtggaattgttgtagcgggattatgtagaaaagatgaacggggaaatccccaatattcagccaatgatttagtcgagctttaccaaaagtacggagcatatatttttaaatcttcatttttgagaagatcaatattttcttggcttaattgcgcacaatacccacataaaaatattgaatttatacttcataaatattttggagaggatattctaaaaaacacattaagtaacgtgttgattacgagttacgatattcacaat…	MIKYILSVDGGGIRGIIPAIILAEIEQRTRKRVAEIFDLIAGTSTGGIVVAGLCRKDERGNPQYSANDLVELYQKYGAYIFKSSFLRRSIFSWLNCAQYPHKNIEFILHKYFGEDILKNTLSNVLITSYDIHNHCPFFFKSWKEDRNFIKLRDVLRAAAAAPTYFAPKYLKVNQKEMVLVDGGVFANNPAACAYASGKRLFPNDDILLLSIGTGRTDRSIANSRRFGKIGWIKPLLHVMFASSLDAVNYQLDQVIGDKYIRIQSQLKIASPDMDNITSKNIKSLQQEAKAMIEENQKVVDKFCDVLS
39	scaffold4	scaffold4_10030_9803	10030	9803	227	-	hypothetical protein	hypothetical protein gwv_1106	hypothetical protein gwv_1106	atgaaaaagcaaaaaatcccaattacagtaattatcacgttattaatccaaaccgtagcattgatatggtggttatccaagctagactcaagggtacaatttcacgataaactcattgaatatggtttaatggaaaaagtgttagtacttgaggaaagggtaaaaaatctttctgaagaattagatgagtttaaattgcaggttttaagcggaaaaattaaatcttaa	MKKQKIPITVIITLLIQTVALIWWLSKLDSRVQFHDKLIEYGLMEKVLVLEERVKNLSEELDEFKLQVLSGKIKS
40	scaffold4	scaffold4_10631_10098	10631	10098	533	-	ankyrin repeat domain protein		ankyrin repeat domain protein	atggataaattaggccaagatacaaaaaataagctacatttttggtggcttatagcagtaatagtatgtattattgctacctattcctatatgaaagcaaaagctgcagataattataaaacaatattacgcattgcttctcaaaattgtaacttagagattgtaaaattctcagtaaaaaatttattggatattggtacacacatgcctaagttaactgcgttgcattacgctgcagaaggaggatgtttagagatagttaggtttttaatagatgagggggttaacgtaaacattactaacaagtatggaagcacagcactacataatgctgcatattatggtgatctaaggattatcaaatttttgctagaaaaaggcgctaatcctaacattata…	MDKLGQDTKNKLHFWWLIAVIVCIIATYSYMKAKAADNYKTILRIASQNCNLEIVKFSVKNLLDIGTHMPKLTALHYAAEGGCLEIVRFLIDEGVNVNITNKYGSTALHNAAYYGDLRIIKFLLEKGANPNIINDDRKKPRNVAVLRSRHNKDKPYDQIIKLLAEAEDRYESTKSNH
41	scaffold4	scaffold4_11619_10684	11619	10684	935	-	Phage tail formation protein D		Phage tail formation protein D	atgaaacctgaatttagcattgaaggaataaaagatcctgtaatatcggtgcatcttactgatgaatctggtactatagatgatgtcgcagaggtatgcgttgattatggcaatgaaaatgtagaagttccaaatgaattgaacatagcattaggttataaggaaacgggaatctttccaatgggtatatatacagtcaacgaagttacgatacaaggcccacctaagactctactaatcaaagctcatgcaacaaatttaagaatatctttgaaagcaaaagtatcaaaagaatggcaccaaattaccatagaaaatttagtaaaagaaatagcccaaaaacatggatatagacataaagttgctgaggaatttaaaaacgtacttataactcacatt…	MKPEFSIEGIKDPVISVHLTDESGTIDDVAEVCVDYGNENVEVPNELNIALGYKETGIFPMGIYTVNEVTIQGPPKTLLIKAHATNLRISLKAKVSKEWHQITIENLVKEIAQKHGYRHKVAEEFKNVLITHINQTEESDISLLTKIAIGREAMVKLAGGYILFISKNMAKSATGKALGTTTVRPQDTINWKVHFTVRDKYNSVVAKWHSYEKGKTIKETVGSGEPSYIMLELYSNAESALSAANAKLKQLKRNNETLDITMPGNPELFAEAKLSLIGFNQAVDGEWIVNRAEHTLNSSGYLTMLSASLSK
42	scaffold4	scaffold4_11829_11620	11829	11620	209	-	Phage tail protein GpX		Phage tail protein GpX	atgacagtacattatataacccgaaaaaatgaaatgttagatcaaatttgctggaaacattatggatatagctctggagcagtagagatagtattggaggaaaatcctggaattgcagattatggaagttttttgcctgcaggattaaaaattaagttacctataatacaagagcaattaaaaaaatcgaagttaaaagtgtgggagtaa	MTVHYITRKNEMLDQICWKHYGYSSGAVEIVLEENPGIADYGSFLPAGLKIKLPIIQEQLKKSKLKVWE
43	scaffold4	scaffold4_12173_11826	12173	11826	347	-	prophage P2W3, tail protein U, putative		prophage P2W3, tail protein U, putative	atgctatcgtttggtcaacataagctttctccaacaagtgtaaggtatagtaaagaaaatcgttggagtactattgagtgtattggtaaaataccttcattacaaaatattggccaaggtacagaaaatatagacttagaaggaataatttattttcataatctcaatgatttaaatcaattaaaaagtatgaaagaagcagaagaaccacatactttagtagacagtttaggtaatgttttagggaggtttgtgattgtacggatagagaaaaaacaaacatcattttttccatgtggattaccaaagaaggttgaatttagcttaagtttaaggcgttatgtatga	MLSFGQHKLSPTSVRYSKENRWSTIECIGKIPSLQNIGQGTENIDLEGIIYFHNLNDLNQLKSMKEAEEPHTLVDSLGNVLGRFVIVRIEKKQTSFFPCGLPKKVEFSLSLRRYV
44	scaffold4	scaffold4_14464_12173	14464	12173	2291	-	Phage tail length tape-measure protein T		Phage tail length tape-measure protein T	atgtcaatgctttcaataaaaataggtgcaacgttagatggcagttttaataatgcaatgacaggtagtgcagcaaagctttctaagttgggtgatagtataaagcagcttgattcgtcaatgaaatctgtttccaaatttaagcaactaaatcatgatgcccttgaagccatgaagaattggaaggaagcggagaagaaagcaaaagaatcagctgcagcaattgctaaagaaaagaaggaaaaaaaagaaccaagcaaagcactgaaaaatgaatttgaaaaattgaaagcatcggcatcaaaggcaaaagaggcttacattaaaaagagagatgcacttcacacattaaatgaagaagtaaggaaaagtggaaaggatattaaatcattagtgaga…	MSMLSIKIGATLDGSFNNAMTGSAAKLSKLGDSIKQLDSSMKSVSKFKQLNHDALEAMKNWKEAEKKAKESAAAIAKEKKEKKEPSKALKNEFEKLKASASKAKEAYIKKRDALHTLNEEVRKSGKDIKSLVRDQTKLGSSIEVLKGKYSKLGSVIQKQQNALAKKAHYRSQVMETIGLGLSLAAPIKVAIDFESAMADVKKVVDFQEGTNEATEFAQKLKKLSREIPLSAAELAQIAASGGQLGIDKGKLLEFTTTVAKMATAFDMSAEQAGDSIAKLSNVYGIDVSKMEHVGNVINHLSDNTAAKAKDMVEALAIVGGTAKQFGFDIKETSSLVNAFVSLGKQPAKAATAINALLSKLQTAEGQGREFKATLESMGITAEEMSQKIAQNGQEALLYF…
45	scaffold4	scaffold4_14834_14580	14834	14580	254	-	Phage tail protein E		Phage tail protein E	atgcaagctataacactaaacaacccaattacagttgatggaatttctgtctcagaattatcgatgcgtgaacctaaagtaagagatttacttgctatagaacgcatagaaggcgaagctttaaaagaagtagctttaattgctaatctagcatccgtaccaaaagaagtagttgaagatttatgtattaaagattatgtagaaatacagaaggtgctaaaagattttttgtcgccgctggaacagaggagttaa	MQAITLNNPITVDGISVSELSMREPKVRDLLAIERIEGEALKEVALIANLASVPKEVVEDLCIKDYVEIQKVLKDFLSPLEQRS
46	scaffold4	scaffold4_15423_14917	15423	14917	506	-	Phage tail tube protein FII		Phage tail tube protein FII	atgttaccgaagattttaaagaattttaatgtattcgtagatggtcggggttatgcaggaaaaatagatgaaataaccttgccaaagctcaccataaaaacagaagaataccgtgctggtggtatggatattccaataaatattgatatgggcatggaaaagcttgaagcagattttactttttctgaatacgatacagaactctttcggctatttgggttgataaatggaaattcagtagctttgacgctccgtggtggaatgcaaggtagtggtagtaacgatattgaagctgtagtaatcaatctcaggggaatattcaaagaatttgactttggtagctggaaacctgctgaaaaagcaacgctaaagtgtactgtagctgcccattactataaa…	MLPKILKNFNVFVDGRGYAGKIDEITLPKLTIKTEEYRAGGMDIPINIDMGMEKLEADFTFSEYDTELFRLFGLINGNSVALTLRGGMQGSGSNDIEAVVINLRGIFKEFDFGSWKPAEKATLKCTVAAHYYKLTIGGNELIEIDAENMIRKINGVDQMALLQTVLGI
47	scaffold4	scaffold4_16584_15439	16584	15439	1145	-	Phage tail sheath protein FI		Phage tail sheath protein FI	atggctgaagaatttttacacggagtaaatgttattgaggtaacctcaggggcaaggacagtacgtacagctaaatcatcagtaataggagtaattggtactgcacctgaagctgatgggcaaaaatttccactaaataaaccagtattaatagcaggaagcttaaaagaagcagcaaaacttggtcaatctgggactttgccttcagctattaatgcaattttttcccaaattggtgcaacagtagtagttattcgagttgaggagaaagtagaagagacgctcagcaatatcattggtggagttgatgaagaaactggagagtatcaagggattcaagcgttcttaagcagtgaaagcatagttcatgttgcgccaagaatactaattgcacctcag…	MAEEFLHGVNVIEVTSGARTVRTAKSSVIGVIGTAPEADGQKFPLNKPVLIAGSLKEAAKLGQSGTLPSAINAIFSQIGATVVVIRVEEKVEETLSNIIGGVDEETGEYQGIQAFLSSESIVHVAPRILIAPQFTHQLSGDAGNPVVSALIPIAEKLRAIIVADGPNTNDEEAIKWRKSVGSSRVYVVDPFIEGKEEILPASPFVAGLIAKVDSEQGFWHSPSNKEINGIVGTSRPIDFTLGNTNCRANHLNENEVTTIIHQNGYRLWGNRTCSNDSKWAFLSVRRTADLINDSLLRAHLWAVDRNITKTYIDDVIEGVNSYLANLKAQGAIISGKCYATPELNTPANIASGKVYFDFEFTPPYPAEQITFRSHLVSGTIL
48	scaffold4	scaffold4_17135_16821	17135	16821	314	-	hypothetical protein	hypothetical protein	hypothetical protein	gtgactatttatatacgttttgaaaaccacaagcagattgaaacaacaacacttgaaaacaagccaactggaaatgattggtatgaagcgccaaaagattttgattggcaaaaaagctattgtttaacagaaggaggcaaaattgctcagcgaaatcaagaagatattgaattggaattattgcaaaatgcgaagttttctgcactttctaatcttcgtgcttattatgataactatactcaccaatacgcaggatattctcaccaaaagctaaatcgtatcaaatacaagaaaaagccgcaaaaagcattctag	MTIYIRFENHKQIETTTLENKPTGNDWYEAPKDFDWQKSYCLTEGGKIAQRNQEDIELELLQNAKFSALSNLRAYYDNYTHQYAGYSHQKLNRIKYKKKPQKAF
49	scaffold4	scaffold4_18603_17146	18603	17146	1457	-	hypothetical protein	hypothetical protein gwv_1117	hypothetical protein gwv_1117	atgaaagaagcaatataccaaaggataaaggatttagcagcaaacagcacacctgatcaactggcatatcttgcaaaatcgctggagttgatagcagataaaaaagctatttccaacgttgtgcagatgactgaagtaaaagggataattgatacactacaaaaaagacttaaggatttagcggtaaatagtactccagatcagcttgcatatcttgctaaggcattggaatcaatagttgacaaaagtgctatttctgaaattgttcagatgactgatggtaagctaaaagaacttcttgatagtgcaaaaaaacacttaactgatcttgataataaaaaagctagttctttagcagtgatctctgaatcagagaagcagttattaaagagaattgat…	MKEAIYQRIKDLAANSTPDQLAYLAKSLELIADKKAISNVVQMTEVKGIIDTLQKRLKDLAVNSTPDQLAYLAKALESIVDKSAISEIVQMTDGKLKELLDSAKKHLTDLDNKKASSLAVISESEKQLLKRIDEKGTTNLSLLDTRKNANIAAINSVGNDHKDGLKGLVNNFRTVNDVPSGSSIMREIRSRENQLTTKLNSINDVPSGSSIMKEVRKRHMIEPGALPFLFGVLSRKNNYFGHGTFTTELGQWSSDITKTDYMLQLLAGTHTYDTSYVSFYRPRQLCFLEGSKGTFIYGESYPRFMYDGFSEQFNMLKYPYAALGVIFVKNTSNVDISKTINFVGSAMWYKDEVNYGGAGLFIGTPDKTNTRKSEISRITWTRIYQHEISSSEFIGSGNI…
50	scaffold4	scaffold4_18794_18600	18794	18600	194	-	hypothetical protein	hypothetical protein gwv_1118	hypothetical protein gwv_1118	atgccaaataaccaaagcaaacgaggatatacactaccacatccagaaaacattgcagtggaagatgtagtacgtattcgaagagctatagaaaaaatagatgaagatattaccgaaagagaagataaacataatcaactaaaaaataattttaaacgatttagatttgaaacttttttgaatttttgggaatga	MPNNQSKRGYTLPHPENIAVEDVVRIRRAIEKIDEDITEREDKHNQLKNNFKRFRFETFLNFWE
51	scaffold4	scaffold4_19104_18799	19104	18799	305	-	hypothetical protein	VrlC protein	VrlC protein	atgggtaatctttcagagtctggagattatgttacaagaagcattacagcaggagctaacactaagattaccataacctatgatgcgctaatacctggcactgcagatgttaaagcatatgtgcaaaaaaacgtggaatggcaattagtaaatttaacatcaggaaaaccaattggagaaaattgggtggagagaactcatgtgctatcaaactttaatggcaatgagacaaggataaaattagttttaagtggaacggttatttatcgtcctaaagtcaaaaatttgcgagtgattattacttga	MGNLSESGDYVTRSITAGANTKITITYDALIPGTADVKAYVQKNVEWQLVNLTSGKPIGENWVERTHVLSNFNGNETRIKLVLSGTVIYRPKVKNLRVIIT
52	scaffold4	scaffold4_19982_19107	19982	19107	875	-	hypothetical protein		VrlC protein	atgttaacagctaataatcaagggcgagtaagtggaaaaataaaaatcccagcagatattccagcaggtactaaattagtacagttttatggggataaaggaagctatggagaagcaacttatactggtaaaaaaactattaccatagaagaaagaagaagagttatcgcagcaagacgagttgatcctttagcgcaaacatttactctaaatgaaagcagacacataggaggtgtggagctatggtttgtaaataaaggcaaaaaacgtgttgttgtgcagattagagaaacagcagtgggaatgccctcgcagactgtcattgctgaaagctatattgagccaaaagatataaagatagatggcacagcaacacgtattacttggtcaccagtgttt…	MLTANNQGRVSGKIKIPADIPAGTKLVQFYGDKGSYGEATYTGKKTITIEERRRVIAARRVDPLAQTFTLNESRHIGGVELWFVNKGKKRVVVQIRETAVGMPSQTVIAESYIEPKDIKIDGTATRITWSPVFCHAGQEYAIVLLTDDADTAVKIAELGKYDAVNSRWVTSQPYQVGVLLSSSNASTWTPHQNLDLTFRLLAAKFSENSHVIDLGKVTANNVSDLIVLTNVEKVAFDTNVEFILTDEEGKENFLSDNLPLALRERLSGELTVKANLKGSKEKVQFSILGYS
53	scaffold4	scaffold4_21920_19989	21920	19989	1931	-	Virulence-associated protein	?	Virulence-associated protein	atgaccttaaatagttattataaccgctttaatcctgacaaagaatacgaaaaaagcttgtttcttgctggaagaggtttgcaatctgcagaattaaacgagactcaggagtatgctctctctaagcttaaaggcataggtgatgcaatatttcgtgatggtgatgttataacaggaagcaattgtattatagatagagaaactggtaaagttacacttgaagcaggaaaaatctatcttcgtggagcagttagaaaagttgaaaaagaagaatttgttattccactgagtaccacagtgcgtataggtgtttattatgtagaatctacgattacagaacttgaggatgaaaatcttcgtgatcctgctgttggtacacgtaattatcaggaagtagga…	MTLNSYYNRFNPDKEYEKSLFLAGRGLQSAELNETQEYALSKLKGIGDAIFRDGDVITGSNCIIDRETGKVTLEAGKIYLRGAVRKVEKEEFVIPLSTTVRIGVYYVESTITELEDENLRDPAVGTRNYQEVGAARLKVSTIWGYQAEGLSPRFSEGEFYPIYNIENGVLIEHSPPPQANIVTTALARYDKEANGSYVVNGLEVMFLQKEEGEGGKKIFVINEGKAHVDGYEIELPHSIRVSFDEDPDIKSVESEPHTFQPNSQRVMELKVNDFPISEIKKVDITVQKTITITHGSYSGAIDPIPDSAVLEIIQIKQGNVIYENSIDYKLNAGNVDWSLPGKEPAPGSSYLITYRCRTQVSPEDISEEGCKVRGAVDNSLVLIDYTWKMPRFDLITIDA…
54	scaffold4	scaffold4_22238_21927	22238	21927	311	-	hypothetical protein		hypothetical protein gwv_1121	gtgctattctgcacaggtgatgaaaacggcgaacttataactccttctggaaggtttaggccttctaatgtaccaaccaataatctttttctcaaatttactttcgatttcacggacgcagcaaatcaagttatacgggaactaggggttatggttggtactaaagtaaaggaaaaagtacctcctggacagagatattttgaaccaaaagatgtagaagatccgggaattttgttagttttagaacacactgtaccacttatcagaactgcagcaactcgggaaactttttcatttgttgtaactttttga	MLFCTGDENGELITPSGRFRPSNVPTNNLFLKFTFDFTDAANQVIRELGVMVGTKVKEKVPPGQRYFEPKDVEDPGILLVLEHTVPLIRTAATRETFSFVVTF
55	scaffold4	scaffold4_22684_22289	22684	22289	395	-	hypothetical protein		hypothetical protein gwv_1121	atgcattttttttggacaaaaattttccaaatcctgaatatatattatataagcctttcaaactcatcacaggtgtcaattcttacacaatcaggtcgagcagcaatagcagcaagtataaaagagcaatctatacatcttgcttggggaacaggtgatacaagctgggaaagtagccataaggtagaaaaagtttttattgagggtgaaatagctctagatcaccacactattaaagatgtaagggtttttacaggacaaacagtgtatcaatccagtattgactatatagttgagagcagtagtggtataataaaacgtacggaaaatagctctattgcagcaggtagcacagttaccgtagagtatactcaaaatacaccagcccagagctga	MHFFWTKIFQILNIYYISLSNSSQVSILTQSGRAAIAASIKEQSIHLAWGTGDTSWESSHKVEKVFIEGEIALDHHTIKDVRVFTGQTVYQSSIDYIVESSSGIIKRTENSSIAAGSTVTVEYTQNTPAQS
56	scaffold4	scaffold4_22864_23361	22864	23361	497	+	FIG01207706: hypothetical protein		hypothetical protein	atgaaacgttattctggtgttgatcctatagttgttcaaaacatacagtaccaagttaaaaggttaaaattttttgaatgctttgctcatgaaactcatgaagatcttgagcaagaactcttctgtgaaatttggacttatcttgatagatatgatgaaagtaaaggtagctttaacacttttgtagcaagattaactaaacgtcgtgctaacaacttattagagaaacaactatgtataaaacgcaatattaataactacatcaatattgagaaaatagaagcttttgaagatgaagtagcgaaacgtactgatgtagattacatgatttcaacgctaccaagaaaaatgcaaaagatatgcgaacaactcaagtactttaacttatatgaagttgct…	MKRYSGVDPIVVQNIQYQVKRLKFFECFAHETHEDLEQELFCEIWTYLDRYDESKGSFNTFVARLTKRRANNLLEKQLCIKRNINNYINIEKIEAFEDEVAKRTDVDYMISTLPRKMQKICEQLKYFNLYEVAKMNNISRTTLNTMIRKIRTKLSSIYYKGKKKN
57	scaffold4	scaffold4_23414_24217	23414	24217	803	+	hypothetical protein		methyl-accepting chemotaxis protein	atgacttttaaaattttaaacaataatgaaagactgaaaacaaccacaggcataaaagtagtaatttttggtccttacggtattggtaaaaccagcctcttaaagactataagtgaaccaacactttgccttgactttgaagcaggtctgcttgctgttcaagattggcagggagattcaattagtgttcgtacttggaatcaagctcgtgatattgcctgcctaattggtggtccgaaccctgcactaaaatctgatcaagcgtatagccaaaaacactatgagcacgtatcaagtaaatacaatgaagagttttctaaatatcgatgtatctttattgatagcatcactgtagcatcacgtctttgtcttttatgggcaagaatgcaacctgagtgt…	MTFKILNNNERLKTTTGIKVVIFGPYGIGKTSLLKTISEPTLCLDFEAGLLAVQDWQGDSISVRTWNQARDIACLIGGPNPALKSDQAYSQKHYEHVSSKYNEEFSKYRCIFIDSITVASRLCLLWARMQPECFSDRSGKEDKRAAYGLLAQEMMAWLNQFQHIRDKDIIIVGTLGQYLDDFNRPTWLPQCEGAKTASEIPGIVDEVISMVGIKKDDGTEKRSFVCQTINTWGYPAKDRSGCLDMVEEPHLGKLLAKIKAKTLAPTV
58	scaffold4	scaffold4_24239_25039	24239	25039	800	+	hypothetical protein		hypothetical protein gwv_1125	atggaacaaagctttttcaacatcggtcaaaaaattccttttttcagcgtaaaggagtatttaagtgatcaaacgccaataccagaagatataatctgtcctagaattttaacgaaaagaggtttattggtactaggtggcccacctaaaatcggcaaaagtgactttttgatctcttggcttctccacatggctgctggtagatcatttcttggtatgacaccaaatagacctttgaaaattttctacatgcaaactgaaattgaatatgaatatatgaaagaacggttgcaacaacttgataatgaacttttgaatgtagctgctaacaacttaatcattaccccaaaagtgcacttatcatttaatcatgatgaaataagtgaaattaagaaaatt…	MEQSFFNIGQKIPFFSVKEYLSDQTPIPEDIICPRILTKRGLLVLGGPPKIGKSDFLISWLLHMAAGRSFLGMTPNRPLKIFYMQTEIEYEYMKERLQQLDNELLNVAANNLIITPKVHLSFNHDEISEIKKIVNERFKPDIIAIDPLRNIFNSSEYGNENDNSAMLFFLQKTLERLRNVINPNSGIILTHHTKKLSKKMLEEDPFQGLSGAGSLRGFYSTGMVMFAHDEESIVRQIVFELRNGERVASKLVDKINGRWKLVDQWS
59	scaffold4	scaffold4_25072_25572	25072	25572	500	+	hypothetical protein		hypothetical protein gwv_1126	atgctatcagattttttaactgattttaatactgcaaaatcacaaagtaatttaataccaaaaggtacaacggtaagagtcaaaatggctattaaacctggtggttatgaagattggttcactaaaagctacactactggcagcatctatttaaacgctgaatttactgtcactgaagggccatatgcaaaacgtaagatttatcaagtaattggtattaaaagtggcaaagcaagcgttgaaaaagaagacatctggggagaatctggtcgttctatgcttagaagcattttggagtcagcacgaaatattcatgcacatgacacttcagaaaaagcaattattgctagaaaaatcaactctatagctgattttaacgggttagaatttactgcaaaa…	MLSDFLTDFNTAKSQSNLIPKGTTVRVKMAIKPGGYEDWFTKSYTTGSIYLNAEFTVTEGPYAKRKIYQVIGIKSGKASVEKEDIWGESGRSMLRSILESARNIHAHDTSEKAIIARKINSIADFNGLEFTAKVGVEADQYGEKNKIATVITPEQNNSIESDWVPF
60	scaffold4	scaffold4_25569_25790	25569	25790	221	+	hypothetical protein		hypothetical protein	ttgaagtacgacgaggagaagctctggattgctgttattgagagagctatgaaagatgcagcaggaaaaaacgtaaagctgaaaggagaagcgataaaatggttaaattcagagtcttttgaaactgtttgtgagctagctaatctcgattttaaacttgtgagagatagcttatctaaagaactaaagggtcatgagaaggtaaagcttatgagtgcttaa	MKYDEEKLWIAVIERAMKDAAGKNVKLKGEAIKWLNSESFETVCELANLDFKLVRDSLSKELKGHEKVKLMSA
61	scaffold4	scaffold4_25864_26538	25864	26538	674	+	hypothetical protein		hypothetical protein	atgtcaattctcacacaatcaggtcgagcagcaatagcagcaagcataaaagagcaaccaatacatcttgcctggggcagtggtgatgccaattgggaaagtagccatcaggtcgaaaaagtttttgttgagggtgaaatcaagcttgaacactaccccattaaagatataagggtttttacaggacagacaatttatcagtcaagtatagactatacagttgctggtgtaattaaacgtacggaaaatagttctattgcagaagatggtgcagttaccatagagtatactcaagatacaccaccagagtccattacgtctgaaaaactgctaaatgaacttggcagacgcgttgtcgatgaggttctcttctgcacaggtgatgagaatggagagctt…	MSILTQSGRAAIAASIKEQPIHLAWGSGDANWESSHQVEKVFVEGEIKLEHYPIKDIRVFTGQTIYQSSIDYTVAGVIKRTENSSIAEDGAVTIEYTQDTPPESITSEKLLNELGRRVVDEVLFCTGDENGELVTPSGRFRPSNVPTNNLFLTFTFDFTDAANQVIRELGVMVGTKVKEELPPGQRYFEPKDVENPGILLVLEHTVPLIRTAATRETFAFVVTF
62	scaffold4	scaffold4_26564_26860	26564	26860	296	+	hypothetical protein		hypothetical protein	atgacaaaagatgcacttactcgtttgcagaagataggacttgatgattccactgctgagcagctactcagttttaaagataacggaaatcttctatatgactcagcatttaagattactgacttatctgaagataggtttgttgaagcagtaaaagatacatttttagaaagcacggcacgggatatctacaaaaaagctgtagctaggaagaagtttatctcagtttatgtagcaaatgctaaggaaatttctgagcctcattatcgagctcaacactgctgcaacatacattaa	MTKDALTRLQKIGLDDSTAEQLLSFKDNGNLLYDSAFKITDLSEDRFVEAVKDTFLESTARDIYKKAVARKKFISVYVANAKEISEPHYRAQHCCNIH
63	scaffold4	scaffold4_26878_29016	26878	29016	2138	+	hypothetical protein		hypothetical protein	atgcatataccaaaaatctttaataccgataattacaatcagtgcgaaagttgccaatcagtactaagtcccgcagcttatctggttaagttattggaaatagttgataaatatattacacaaccaactaaatcacttaaggaacgtcgtcctgatctctacgatattaaactcgattgcgacaatactaacaaagaaaagttatatcttgaaattgtcaatgagataatggagaaaaagctaaaacatgatcttggagatgatgttctacgcaagcttgcaactgccaaatatccttttaatcttccggcaaattttccgctaatgagtatacgtgcttaccttaagaaacataagacgagcttagcagagatatataaaatgctcattgaaaatgct…	MHIPKIFNTDNYNQCESCQSVLSPAAYLVKLLEIVDKYITQPTKSLKERRPDLYDIKLDCDNTNKEKLYLEIVNEIMEKKLKHDLGDDVLRKLATAKYPFNLPANFPLMSIRAYLKKHKTSLAEIYKMLIENADTDAEFLGLSPEEYKVITSDNETEAYLKEVYGITEIAQLKNVDTFIAQTGIEHDKLQPLLDSYNKIKGSIILAVTEQTIDEHRKRIIDNLDNQALSFLHRFIRLANKLNWSFDELTQALSEGKIDQKKIAKIKSLQEKFQQPLAKIFALYADSLPESVSNKIDNLTEFKTLLSQKSLKDLAATASNYSALQNILGVNSNELTSLINYHNDQKVFGEEILKVYKQVLLARLINIPIAELLSQLKIEGVNQENVVEFNDWLKKHTITT…
									Hypothetical	20
									Described	43
									Structural	17
									Propogation (replication, repair, transduction)	6
									Transcriptional regulator	4
									Ankyrin repeat	4
									Virulence	4
									Integration	4
									Lysis	2
									Unknown	2
